# Supplementary material
Source: PubMed Central journal article supplement (PMC7477730)
Supplement: NIHMS1623027-supplement-Supplementary_material_of_Concurrent_chemoradiation__for_cervical_cancer.pdf [file NIHMS1623027-supplement-Supplementary_material_of_Concurrent_chemoradiation__for_cervical_cancer.pdf]

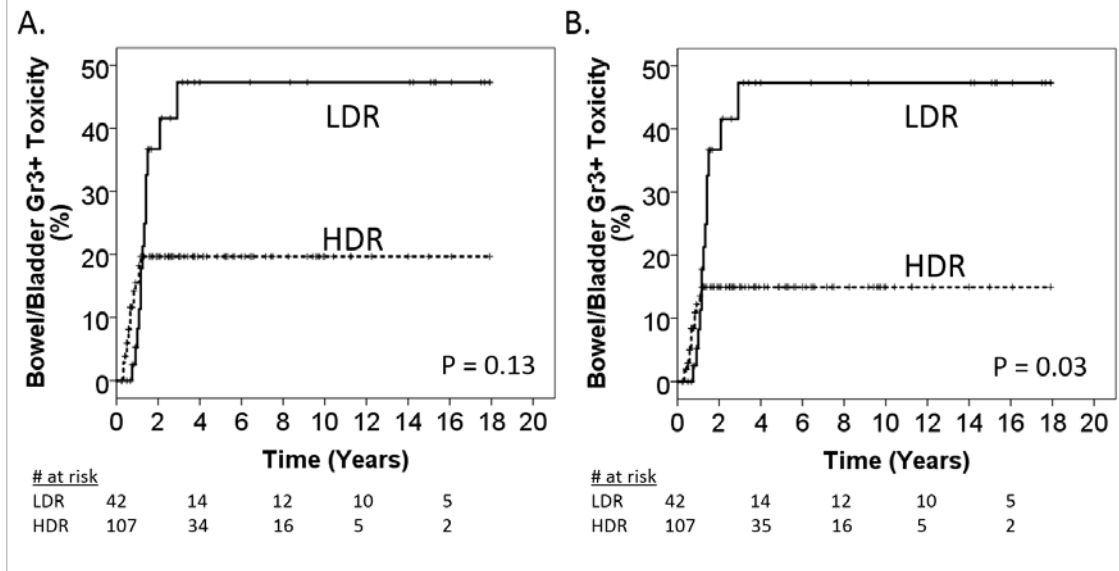

**Supplemental Figure 1:** Subset analysis of FIGO stage III-IVB tumors. A) Cumulative hazard plot of grade 3 or higher bowel/bladder late toxicities in the LDR and HDR groups. B) Cumulative hazard plot of grade 3 or higher bowel/bladder late toxicities in the LDR and HDR groups without censoring for patients with coinciding tumor recurrence.
